# Supplementary material for: Precursor- and waste-free synthesis of spark-ablated nanoparticles with enhanced photocatalytic activity and stability towards airborne organic pollutant degradation
Source: Royal Society of Chemistry journal article supplement (doi:10.1039/d3en00348e), 2024-01-01
Supplement: d3en00348e1.pdf [file d3en00348e1.pdf]

## Supplementary material

### **Precursor- and waste-free synthesis of spark-ablated nanoparticles with enhanced photocatalytic activity and stability towards airborne organic pollutant degradation**

Sarka Drdova<sup>1,2</sup>, Gao Min<sup>1,2</sup>, Olga Sambalova<sup>2</sup>, Robin Pauer<sup>3</sup>, Zhouping Zhou<sup>4</sup>, Sofia Dimitriadou<sup>5</sup>, Andreas Schmidt-Ott<sup>4,5</sup> and Jing Wang<sup>1,2</sup>

<sup>1</sup> Institute of Environmental Engineering, ETH Zurich, 8093 Zürich, Switzerland

<sup>2</sup> Laboratory for Advanced Analytical Technologies, Empa – Swiss Federal Laboratories for Materials Science and Technology, 8600 Dübendorf, Switzerland

<sup>3</sup> Electron Microscopy Center, Empa – Swiss Federal Laboratories for Materials Science and Technology, 8600 Dübendorf, Switzerland

<sup>4</sup> Chemical Engineering Department, Delft University of Technology, 2600 AA Delft, the Netherlands

<sup>5</sup> VSPARTICLE B.V., 2629 JD Delft, the Netherlands

Keywords: spark-ablation, precursor and waste-free nanoparticle production, photocatalysis, VOC degradation, manganese oxide, titanium dioxide, zinc oxide

Corresponding author: [jing.wang@ifu.baug.ethz.ch](mailto:jing.wang@ifu.baug.ethz.ch)

## Supplementary tables

Table S1 Estimation of MnO<sub>x</sub> Sp5 crystalline phase using Miller indices and calculated *d*-spacing

| <i>Crystalline phase</i> | <i>Crystal Plane<br/>Miller indices</i> | <i>Referenced<br/>d-spacing</i> | <i>Measured<br/>d-spacing</i> |
|--------------------------|-----------------------------------------|---------------------------------|-------------------------------|
| <i>Ramsdellite</i>       | (110)                                   | 4.02                            | 3.93                          |
| <i>Pyrolusite</i>        | (110)                                   | 3.12                            | 3.15                          |
| <i>Hausmannite</i>       | (112)                                   | 3.08                            | 3.02                          |
| <i>Hausmannite</i>       | (200)                                   | 2.88                            | 2.90                          |
| <i>Hausmannite</i>       | (103)                                   | 2.76                            | 2.69                          |
| <i>Ramsdellite</i>       | (310)                                   | 2.55                            | 2.54                          |
| <i>Ramsdellite</i>       | (111)                                   | 2.32                            | 2.34                          |
| <i>Pyrolusite</i>        | (210)                                   | 1.97                            | 1.99                          |
| <i>Ramsdellite</i>       | (311)                                   | 1.90                            | 1.88                          |
| <i>Hausmannite</i>       | (105)                                   | 1.80                            | 1.77                          |
| <i>Ramsdellite</i>       | (221)                                   | 1.64                            | 1.64                          |
| <i>Hausmannite</i>       | (400)                                   | 1.44                            | 1.43                          |
| <i>Pyrolusite</i>        | (301)                                   | 1.31                            | 1.32                          |

Table S2 Estimation of TiO<sub>2</sub> Sp5 crystalline phase using Miller indices and calculated *d*-spacing

| <i>Crystalline phase</i> | <i>Crystal Plane<br/>Miller indices</i> | <i>Referenced<br/>d-spacing</i> | <i>Measured<br/>d-spacing</i> |
|--------------------------|-----------------------------------------|---------------------------------|-------------------------------|
| <i>Anatase</i>           | (101)                                   | 3.53                            | 3.69                          |
| <i>Anatase</i>           | (103)                                   | 2.43                            | 2.65                          |
| <i>Anatase</i>           | (004)                                   | 2.38                            | 2.18                          |
| <i>Anatase</i>           | (200)                                   | 1.89                            | 1.86                          |
| <i>Anatase</i>           | (105)                                   | 1.7                             | 1.64                          |

Table S3 Size of nanoparticles obtained using XRD and TEM method and anatase content estimation

| <i>Sample</i>               | <i>D<sub>XRD</sub> (nm)</i> | <i>D<sub>TEM</sub> (nm)</i> | <i>Anatase XRD (%)</i> | <i>Anatase Bandgap (%)</i> |
|-----------------------------|-----------------------------|-----------------------------|------------------------|----------------------------|
| <i>TiO<sub>2</sub> Sp10</i> | 9.5                         | 8.7                         | 86%                    | 82%                        |
| <i>TiO<sub>2</sub> Sp5</i>  | 8.4                         | 9.2                         | 100%                   | 98%                        |
| <i>TiO<sub>2</sub> P25</i>  | 22                          |                             | 60%                    | 68%                        |

Table S4 Estimation of AOS and surface defects from XPS analysis for manganese oxide samples

| <i>Sample</i>                | <i>p(MnO<sub>2</sub> fit)</i> | <i>p(MnOOH fit)</i> | <i>AOS<sup>1</sup></i> | <i>Lattice oxygen<sup>2</sup></i> | <i>Non-lattice oxygen<sup>2</sup></i> | <i>Adsorbed water<sup>2</sup></i> | <i>Surface defects or OH groups<sup>3</sup></i> |
|------------------------------|-------------------------------|---------------------|------------------------|-----------------------------------|---------------------------------------|-----------------------------------|-------------------------------------------------|
| <i>MnO<sub>x</sub> 10 Sp</i> | 4.7%                          | 95%                 | <b>3.05</b>            | 28814                             | 24287                                 | 1765                              | <b>52%</b>                                      |
| <i>MnO<sub>x</sub> 5 Sp</i>  | 6.2%                          | 94%                 | <b>3.06</b>            | 26294                             | 28670                                 | 243                               | <b>46%</b>                                      |
| <i>MnO<sub>x</sub> 1 Sp</i>  | 6.7%                          | 93%                 | <b>3.06</b>            | 27555                             | 24279                                 | 512                               | <b>46%</b>                                      |
| <i>MnO<sub>2</sub></i>       | 23.2%                         | 77%                 | <b>3.23</b>            | 24823                             | 22233                                 | 1315                              | <b>44%</b>                                      |

<sup>1</sup>Averaged oxidation state determined as  $(p(\text{MnO}_2 \text{ fit}) \cdot (4+) + p(\text{MnOOH fit}) \cdot (3+))$ . <sup>2</sup>XPS peak area. <sup>3</sup>Ratio of surface defects or/and adsorbed OH groups

Table S5 Estimation of AOS and surface defects from XPS analysis for titanium dioxide and zinc oxide samples

| <i>Sample</i>                | <i>p(Ti(III) fit)</i> | <i>p(Ti(IV) fit)</i> | <i>AOS<sup>1</sup></i> | <i>Lattice oxygen<sup>2</sup></i> | <i>Non-lattice oxygen<sup>2</sup></i> | <i>Adsorbed water<sup>2</sup></i> | <i>Surface defects or OH groups<sup>3</sup></i> |
|------------------------------|-----------------------|----------------------|------------------------|-----------------------------------|---------------------------------------|-----------------------------------|-------------------------------------------------|
| <i>TiO<sub>2</sub> 10 Sp</i> | 6.3%                  | 94%                  | <b>3.82</b>            | 45007                             | 19912                                 | 0                                 | <b>31%</b>                                      |
| <i>TiO<sub>2</sub> 5 Sp</i>  | 6.4%                  | 94%                  | <b>3.81</b>            | 42378                             | 17719                                 | 0                                 | <b>30%</b>                                      |
| <i>TiO<sub>2</sub> P25</i>   | 8.9%                  | 91%                  | <b>3.78</b>            | 34505                             | 24856                                 | 85                                | <b>42%</b>                                      |
| <i>ZnO 10 Sp</i>             | -                     | -                    | -                      | 27258                             | 19035                                 | 0                                 | <b>41%</b>                                      |
| <i>ZnO NanoArc</i>           | -                     | -                    | -                      | 28801                             | 17193                                 | 881                               | <b>37%</b>                                      |

<sup>1</sup>Averaged oxidation state determined as  $(p(\text{Ti(IV)}) \cdot (4+) + p(\text{Ti(III)}) \cdot (3+))$ . <sup>2</sup>XPS peak area. <sup>3</sup>Ratio of surface defects or/and adsorbed OH groups

Table S6 Nanoparticle mass loading on filter substrates, degradation rate constant  $k$  and mass-normalized degradation rate constant  $k_{norm}$

| <i>Sample</i>                     | <i>Mass loading g/m<sup>2</sup>*</i> | <i>k (min<sup>-1</sup>)</i> | <i>k<sub>norm</sub> (min<sup>-1</sup>)</i> |
|-----------------------------------|--------------------------------------|-----------------------------|--------------------------------------------|
| <i>MnO<sub>x</sub> Sp10</i>       | 8.3                                  | 0.109                       | 0.132                                      |
| <i>MnO<sub>x</sub> Sp5</i>        | 9.1                                  | 0.095                       | 0.104                                      |
| <i>MnO<sub>x</sub> Sp1</i>        | 12.3                                 | 0.126                       | 0.102                                      |
| <i>MnO<sub>2</sub> Nanoflakes</i> | 9.6                                  | 0.068                       | 0.072                                      |
| <i>TiO<sub>2</sub> Sp10</i>       | 6.4                                  | 0.045                       | 0.047                                      |
| <i>TiO<sub>2</sub> Sp5</i>        | 6.8                                  | 0.098                       | 0.147                                      |
| <i>TiO<sub>2</sub> P25</i>        | 6.8                                  | 0.068                       | 0.100                                      |
| <i>ZnO Sp10</i>                   | 10.6                                 | 0.018                       | 0.017                                      |
| <i>ZnO NanoArc</i>                | 10.6                                 | 0.015                       | 0.014                                      |

\*The mass loading was determined by the mass of a filter before and after the deposition process per unit area of the filter.

Table S7 Toluene removal efficiencies after 60 min of irradiation

|             | <i>MnOx Sp</i> | <i>MnO<sub>2</sub></i> | <i>TiO<sub>2</sub> Sp</i> | <i>TiO<sub>2</sub> P25</i> | <i>ZnO Sp10</i> | <i>ZnO NanoArc</i> |
|-------------|----------------|------------------------|---------------------------|----------------------------|-----------------|--------------------|
| <i>Run1</i> | 99.7%          | 98.2%                  | 99.6%                     | 96.6%                      | 60.3%           | 55.2%              |
| <i>Run2</i> | 99.7%          | 90.6%                  | 99.4%                     | 81.3%                      | 34.0%           | 30.7%              |
| <i>Run3</i> | 99.6%          | 71.4%                  | 98.9%                     | 56.5%                      | 27.8%           | 22.2%              |
| <i>Run4</i> | 99.4%          | 65.1%                  | 97.0%                     | 37.0%                      | 20.2%           | 17.3%              |

## Supplementary figures

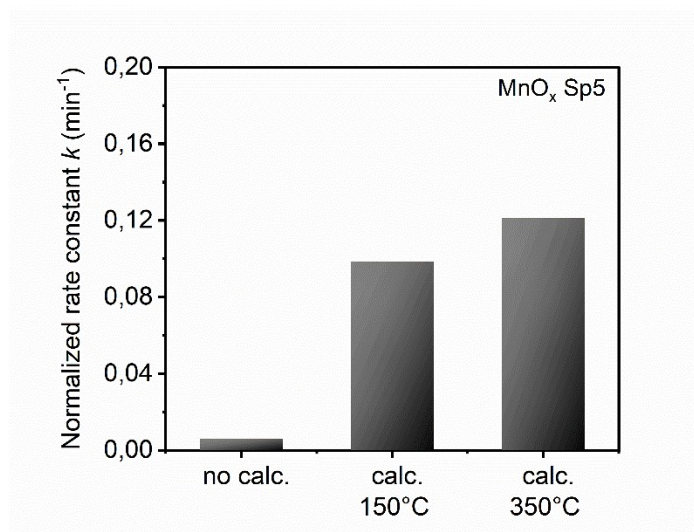

Figure S1 Preliminary experiments showing toluene degradation rate constant of MnO<sub>x</sub> samples as-prepared with no calcination and calcined at 150 °C and 350 °C.

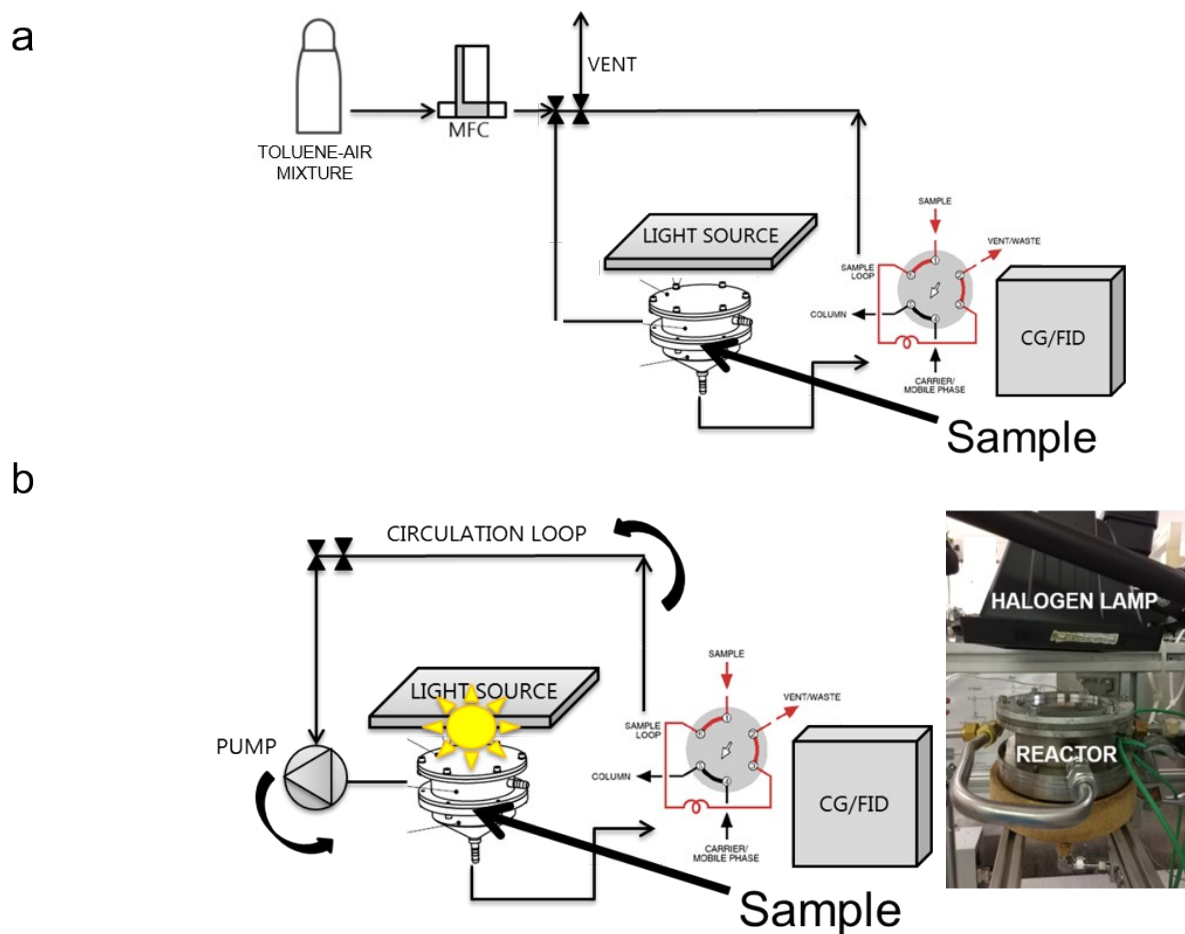

Figure S2 Schematic representation of photocatalytic degradation setup. a) configuration of toluene introduction into the reaction system and b) phase of toluene circulation (lamp off) and circulation and reaction (lamp on). The irradiation was facilitated by using either halogen lamp emitting UV-Vis-NIR simulating solar irradiation for manganese oxide materials or black light lamp emitting an UVA spectrum for titanium dioxide and zinc oxide materials. During the use of UVA irradiation, proper precautions were implemented to ensure the safety of occupants. These measures included adequately covering the experimental setup and wearing essential protective gear, such as lab coats, gloves, and UV-absorbing goggles or face shields. These precautions were implemented to minimize the risk of skin and eye exposure.

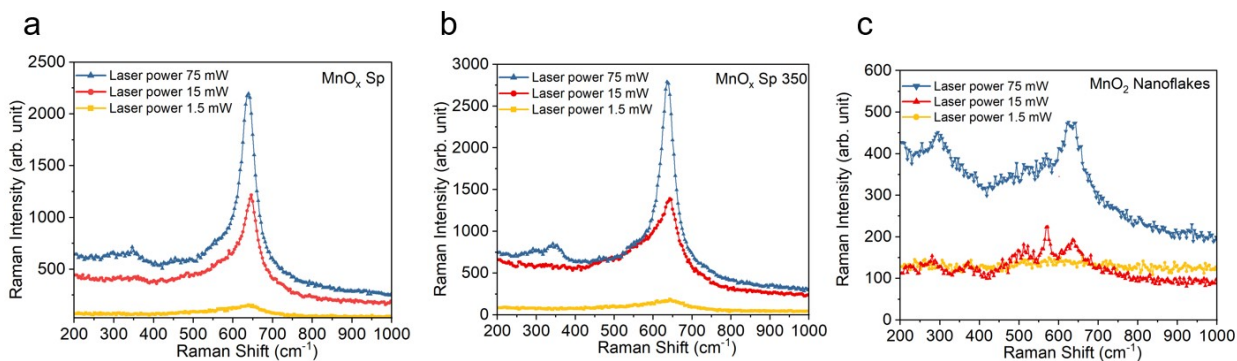

Figure S3 Raman spectra of spark-ablated a) as-prepared and b) calcined at 350 °C, and c) sol-gel prepared manganese oxide samples using distinct power conditions of 0.1%, 1%, 5%, and 10% of the full laser power (10% caused burning of samples, thus, data are not provided). A laser power level of 1% (equivalent to 15 mW) that was employed in conjunction with a 100x magnification and an accumulation time of 60 seconds offered a minimal degree of sample degradation.

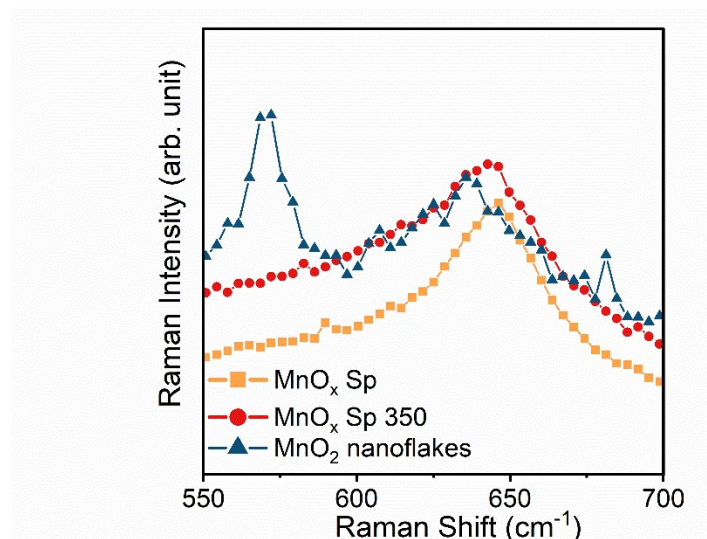

Figure S4 Comparison of Raman spectra at Mn-O vibration modes from 550  $\text{cm}^{-1}$  to 700  $\text{cm}^{-1}$  for spark-ablated a) as-prepared ( $\text{MnO}_x \text{ Sp}$ ) and b) calcined at 350 °C ( $\text{MnO}_x \text{ Sp 350}$ ), and c) wet-chemistry prepared ( $\text{MnO}_2$  nanoflakes) manganese oxide samples.

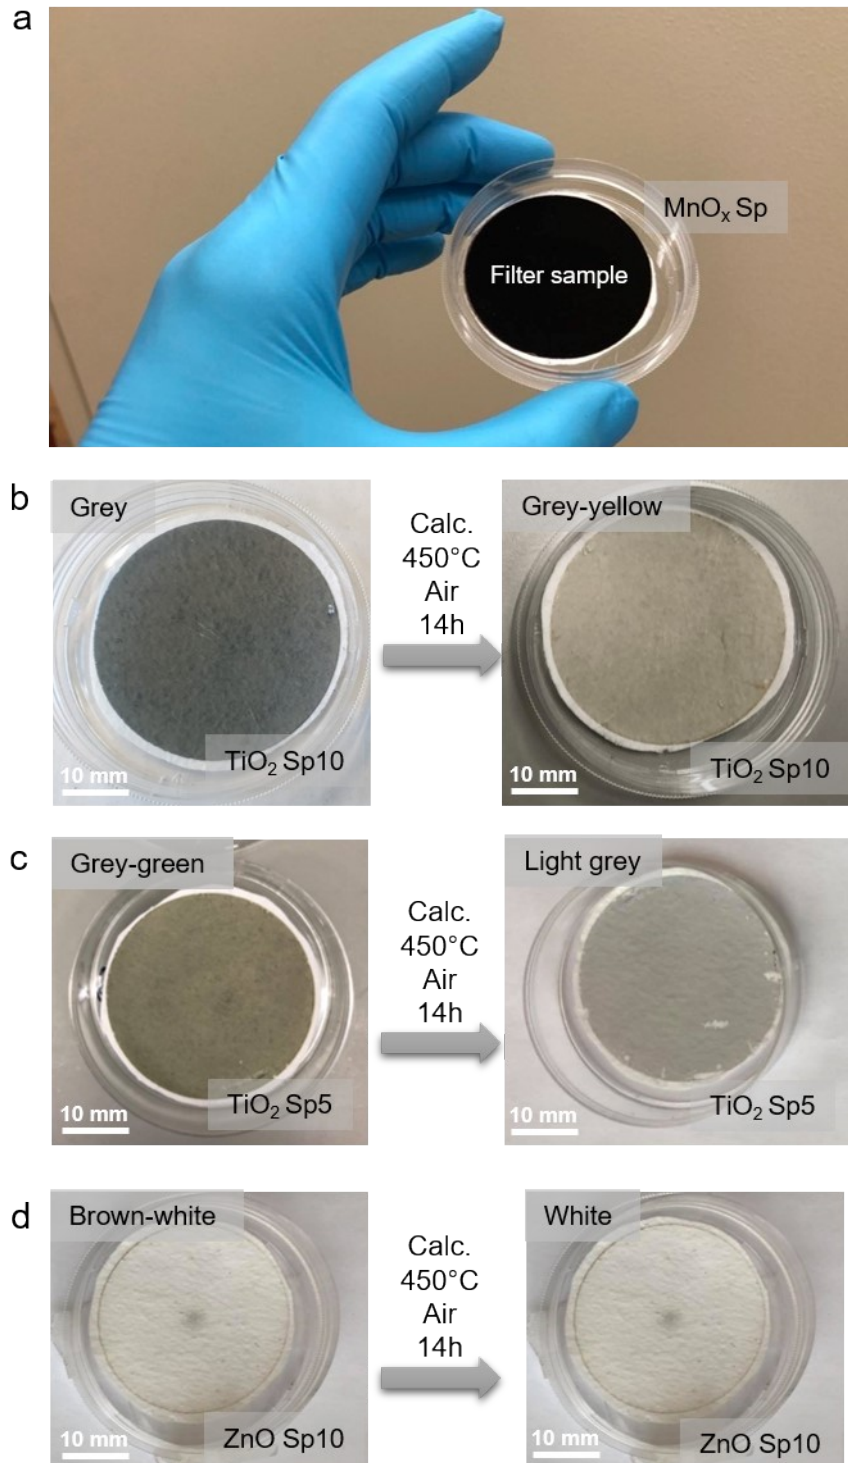

Figure S5 Photographs of spark-ablated samples for a) MnO<sub>x</sub> Sp representative sample, b) TiO<sub>2</sub> Sp10, c) TiO<sub>2</sub> Sp5, d) ZnO Sp10 before and after calcination.



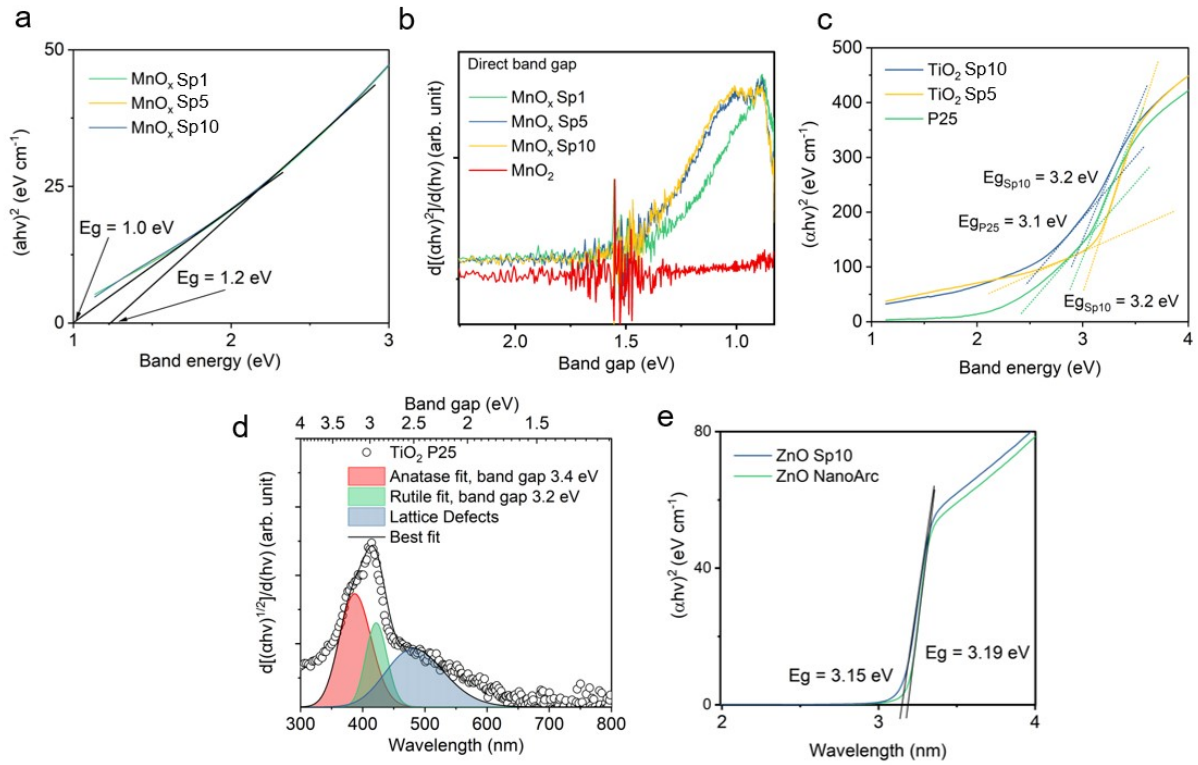

Figure S6 Tauc plot of band gap for a) MnO<sub>x</sub>, c) TiO<sub>2</sub>, and e) ZnO samples with indirect transition energies. Band gaps E<sub>g</sub> were obtained from a), e) the extrapolation to  $(\alpha h\nu)^2 = 0$ , and from c) the intersection of extrapolation to  $(\alpha h\nu)^2 = 0$  and an abscissa as the slope below the fundamental absorption, which is considered as the baseline in the sub-bandgap region of the Tauc plot. The 1<sup>st</sup> derivative of the Tauc plot b) and d) as a more sensitive method for the determination of band gaps.

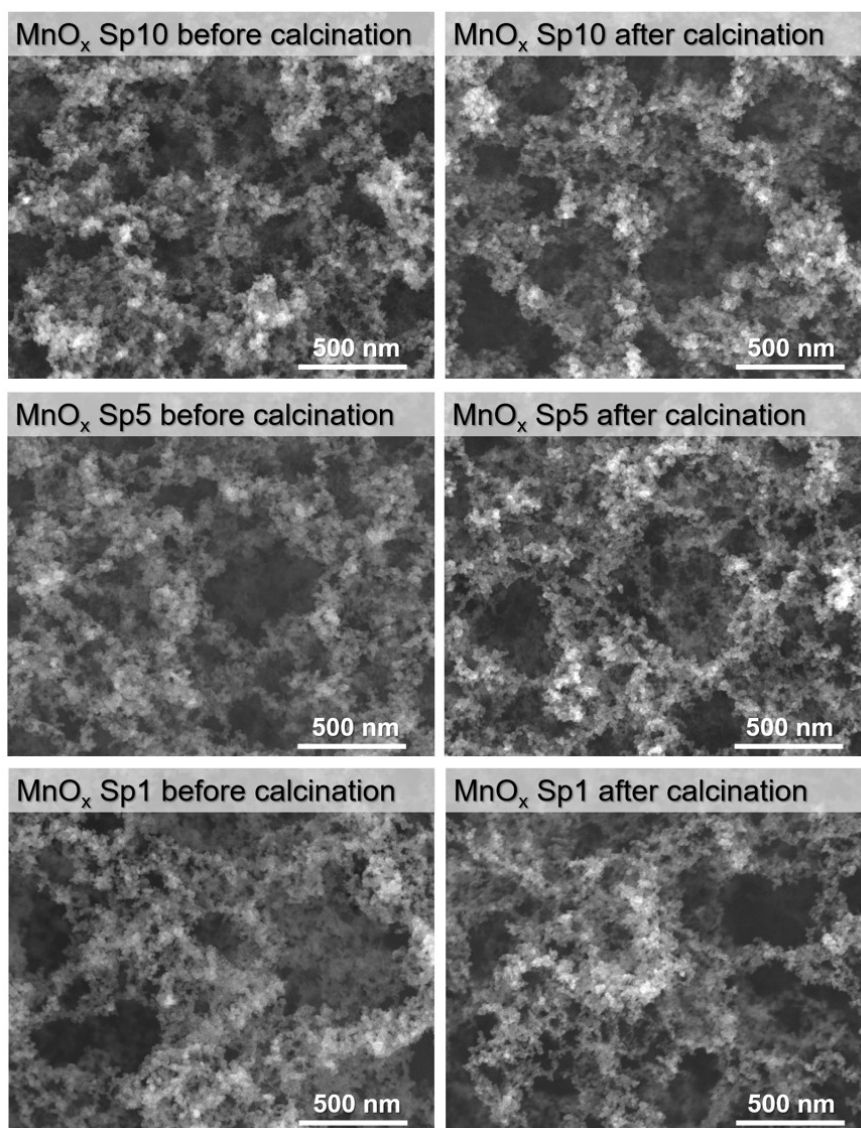

Figure S7 SEM images of MnO<sub>x</sub> Sp samples before and after calcination.

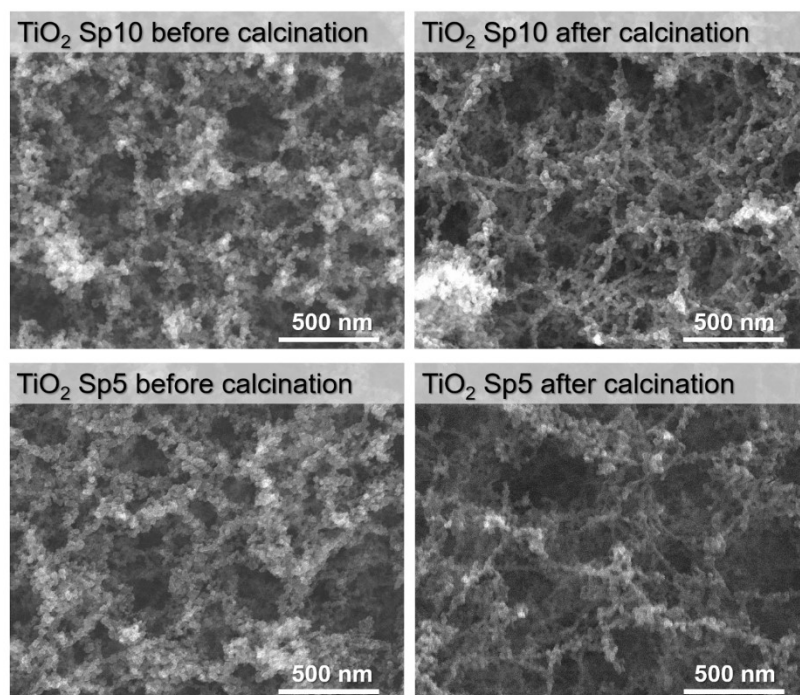

Figure S8 SEM images of  $\text{TiO}_2$  Sp samples before and after calcination.

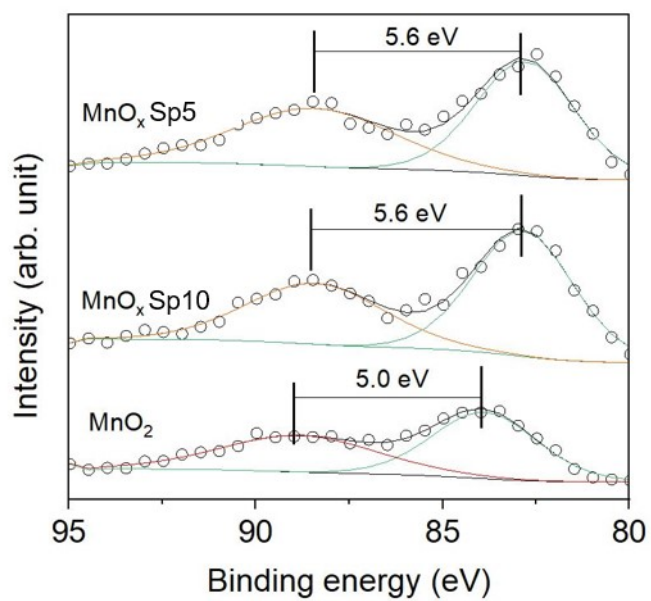

Figure S9 XPS spectra of Mn 3s core level splitting for  $\text{MnO}_x$  Sp5,  $\text{MnO}_x$  Sp10, and sol-gel  $\text{MnO}_2$ .

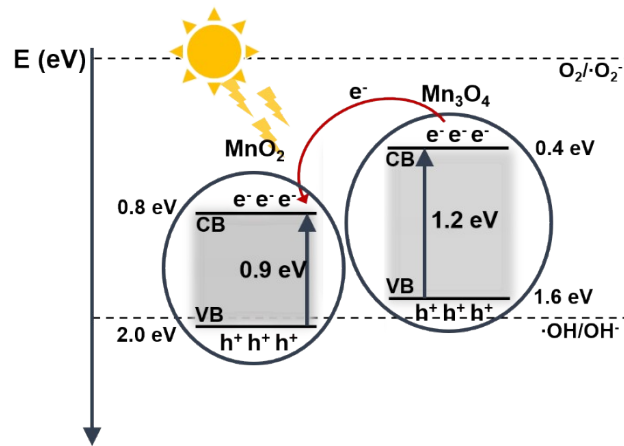

Figure S10 Suggested schematic representation of light induced charge carriers' generation and transfer for  $\text{Mn}_3\text{O}_4$  and  $\text{MnO}_2$  showing calculated values of valence band (VB) and conduction band (CB) determined from theoretical values of electron affinity and ionization energy and experimentally determined band gap energy.

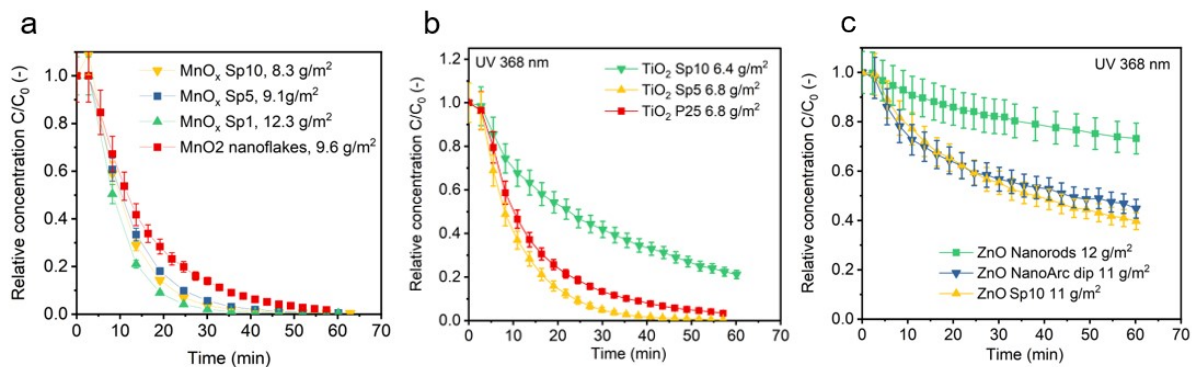

Figure S11 a) Relative concentration of toluene over the degradation period under UV-Vis-NIR irradiation for spark-ablated manganese oxide ( $\text{MnO}_x$ ) nanoparticles and  $\text{MnO}_2$  nanoflakes and under UV irradiation for spark-ablated c) titanium dioxide ( $\text{TiO}_2$ ) and e) zinc oxide ( $\text{ZnO}$ ) nanoparticles.

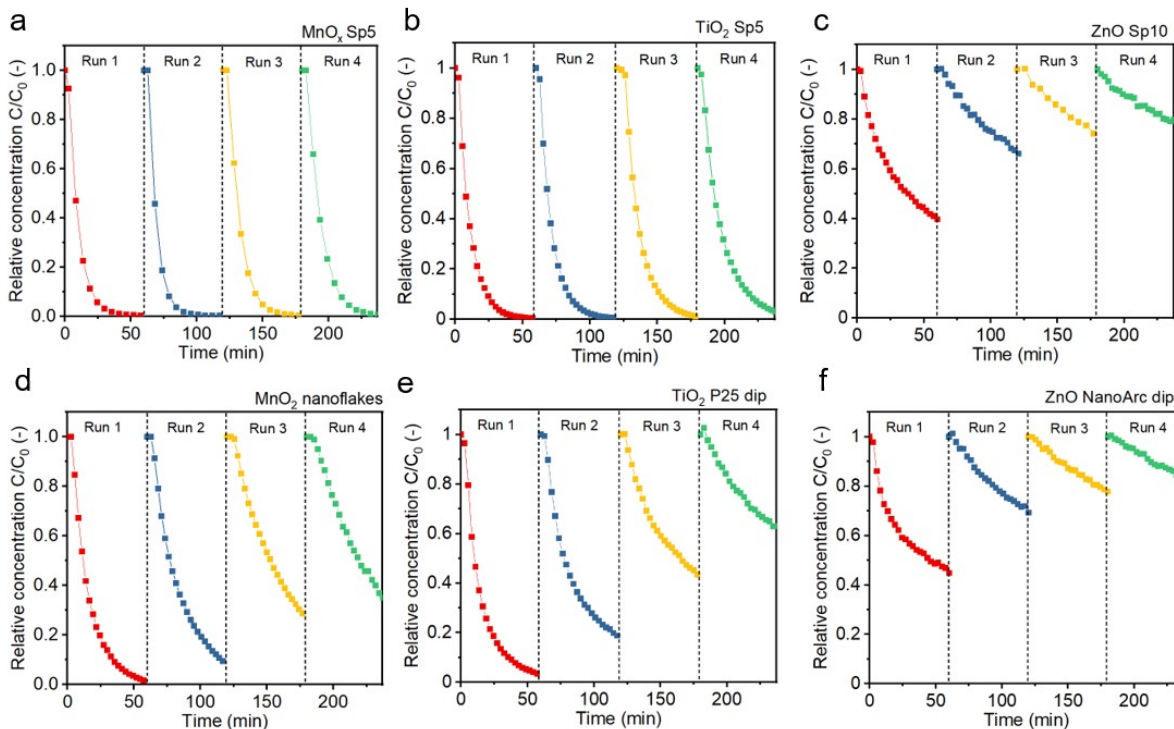

Figure S12 Photocatalyst stability over four consecutive toluene degradation cycles represented as relative concentration of toluene over irradiation time for a), spark-ablated and d) sol-gel manganese oxide ( $MnO_x$  and  $MnO_2$  nanoflakes), b) spark-ablated and e) commercial titanium dioxide ( $TiO_2$  Sp5 and  $TiO_2$  P25), and c) spark-ablated and f) commercial zinc oxide ( $ZnO$  Sp10 and  $ZnO$  NanoArc) nanoparticles.

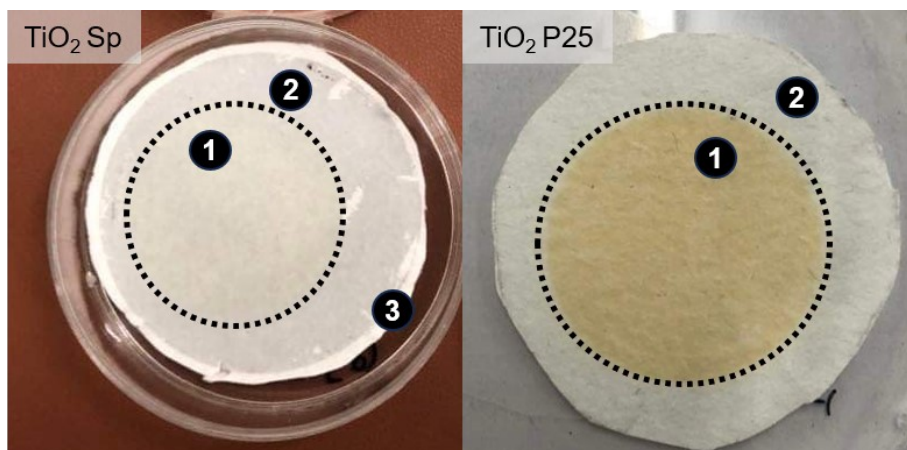

Figure S13 Photographs of filters with TiO<sub>2</sub> nanoparticles, obtained using the spark ablation method (left), and dip-coating of commercial TiO<sub>2</sub> nanoparticles taken after a photocatalytic stability assessment (four toluene degradation cycles). (1) shows the irradiated area with noticeable yellowing, which originated from fouling, i.e., the adsorption of intermediates. (2) shows the non-irradiated area where the nanoparticles maintained their original color, i.e., no adsorption of intermediates. (3) shows a non-coated and non-irradiated part of filter (blank). It is apparent that the fouling effect predominated on the surface of commercial TiO<sub>2</sub>.
